# Supplementary material for: Self-care strategies and sources of knowledge on menstruation in 12,526 young women with dysmenorrhea: A systematic review and meta-analysis
Source: PubMed Central journal article supplement (PMC6655766; doi:10.1371/journal.pone.0220103), 2019-07-24
Supplement: pone.0220103.s001.pdf [file pone.0220103.s001.pdf]

Adolescen\* OR child OR young OR paediatric OR pediatric\* OR girls OR females OR school girls

**AND**

dysmenorrh\* OR dysmenorrhoea OR menstrual cycle OR endometriosis OR menstr\* disorders OR menstrual pain OR painful menstr\* OR period pain

**AND**

Self-care OR symptoms OR practices OR management
